# Supplementary material
Source: Springer Nature journal article supplement (https://www.springermedizin.de/resource/supplementary/12987_2013_74_MOESM6_ESM.pdf/9680282)

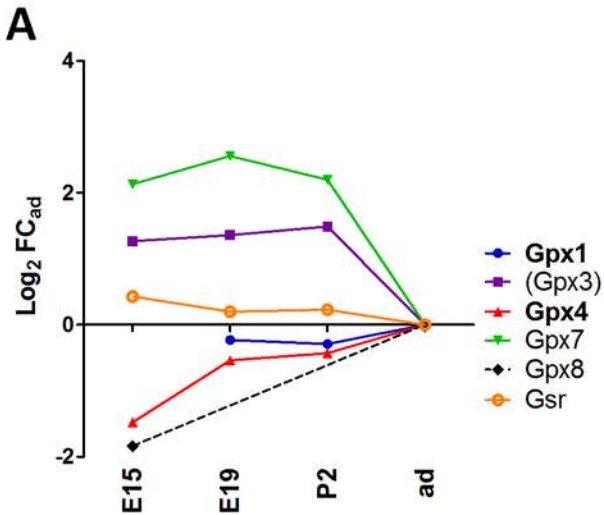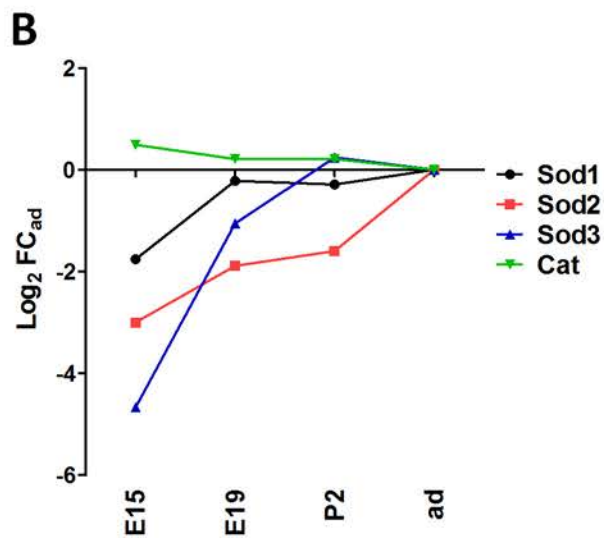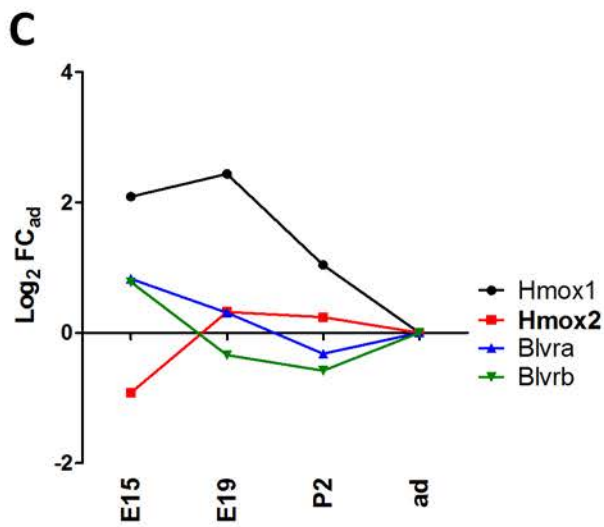

Supplement: MOESM6 [file 9680282]
